1 **CONVERGENT TRANSCRIPTOMIC TARGETS OF PROPRANOLOL AND**  
2 **PRIMIDONE IDENTIFY POTENTIAL BIOMARKERS FOR ESSENTIAL TREMOR**

3 Charles-Etienne Castonguay,<sup>1,2,3</sup> Calwing Liao,<sup>1,2</sup> Anouar Khayachi,<sup>2</sup> Gabrielle Houle<sup>1,2</sup>, Jay P Ross,<sup>1,2</sup> Patrick A  
4 Dion,<sup>2</sup> Guy A Rouleau<sup>2</sup>

5 1 Department of Human Genetics, McGill University, Montréal, QC, Canada

6 2 Montreal Neurological Institute, McGill University, Montréal, QC, Canada

7 3 Faculté de Médecine, Université de Montréal, Montréal, QC, Canada

8

9 Corresponding author : [guy.rouleau@mcgill.ca](mailto:guy.rouleau@mcgill.ca)

10

11 **ABSTRACT**

12 Essential tremor (ET) is one of the most common movement disorders, affecting nearly 5% of  
13 individuals over 65 years old. Despite its high heritability, few genetic risk loci for ET have been  
14 identified. Recent advances in pharmacogenomics have generated a wealth of data that led to the  
15 identification of molecular signatures in response to hundreds of chemical compounds. Among the  
16 different forms of data, gene expression has proven to be quite successful for the inference of drug  
17 response in cell models. We sought to leverage this approach in the context of ET where many  
18 patients are responsive to two drugs: propranolol and primidone. Propranolol- and primidone-  
19 specific transcriptomic drug targets, as well as convergent gene targets across both drugs, could  
20 provide insights into the pathogenesis of ET and identify possible targets of interest for future  
21 treatments. In this study, cerebellar DAOY and neural progenitor cells were treated for 5 days with  
22 clinical concentrations of propranolol and primidone, after which RNA-sequencing was used to  
23 identify differentially expressed genes. The expression of genes previously implicated in genetic  
24 and transcriptomic studies of ET and other movement disorders, such as *TRAPPC11*, were  
25 significantly upregulated by propranolol. Pathway enrichment analysis identified multiple terms

26 related to calcium signalling, endosomal sorting, axon guidance, and neuronal morphology.  
27 Convergent differentially expressed genes across all treatments and cell types were also found to  
28 be significantly more mutationally constrained, implying that they might harbour rare deleterious  
29 variants implicated in disease. Furthermore, these genes were enriched within cell types having  
30 high expression of ET related genes in both cortical and cerebellar tissues. Altogether, our results  
31 highlight potential cellular and molecular mechanisms associated with tremor reduction and  
32 identify relevant genetic biomarkers for drug-responsiveness in ET.

33

## 34 **INTRODUCTION**

35 Essential tremor (ET) is one of the most common movement disorders<sup>1</sup> affecting around 5% of  
36 individuals over 65 years old. The disease causes a 8-12 Hz kinetic tremor that typically affects  
37 the upper limbs but can also affect the head, voice, and rarely the lower limbs. Tremor intensity  
38 can sometimes increase with age and have a severe impact on activities of daily living. Recent  
39 studies aimed at identifying common and rare genetic variants have yielded mixed results, possibly  
40 due to clinical heterogeneity thus decreasing power of genetic studies<sup>2</sup>. Only a handful of variants  
41 have been identified and even fewer of them were replicated in other studies. Therefore, new  
42 approaches are needed, and transcriptomics might yield new insights in the pathophysiology of  
43 ET.

44

45 Recent studies in psychiatric genetics have successfully used drug effect screens to identify  
46 putative disease genes<sup>3,4</sup>. This approach is particularly relevant to diseases that have specific drug-  
47 responsive subsets of patients, as is the case with lithium responsive patients in bipolar disorder

48 (BD)<sup>5</sup>. This kind of approach has yet to be used in many drug-responsive neurological disorders  
49 such as ET where patients respond to two drugs: propranolol and primidone<sup>6</sup>.

50  
51 Propranolol and primidone are the most common drug treatments for ET. Both are efficient at  
52 reducing tremor by about 50% in ET patients<sup>6</sup>. Drug response is variable between patients, with  
53 some having a better outcome with either propranolol or primidone. Interestingly, some patients  
54 respond better to a combination of both drugs, especially for reducing limb and head tremors,  
55 hinting at potential additive or synergistic effects<sup>7</sup>. Propranolol is a beta-adrenergic receptor 1/2  
56 antagonist initially developed to treat hypertension. In the context of ET, propranolol is thought to  
57 act on peripheral beta-2 receptors in muscle spindles, but it also has effects on cells in the central  
58 nervous system (CNS)<sup>7,8</sup>. Propranolol is lipophilic enough to cross the blood brain barrier (BBB)  
59 and to accumulate in high concentrations in mouse cerebellum and cortex following treatment<sup>9</sup>.  
60 Primidone is an anticonvulsant whose mechanism of action in ET is not well defined but it possibly  
61 reduces calcium and sodium currents across neuronal membranes<sup>6</sup>, therefore, reducing neuronal  
62 excitability.

63  
64 The transcriptomic effects of primidone and propranolol in the context of ET remain poorly  
65 understood<sup>10,11</sup>. Propranolol increased the expression *SHF*, a gene that was shown to be  
66 downregulated in ET patient cerebellum<sup>10</sup>. Studying the effects of tremor-reducing drugs on  
67 transcription can inform us on mechanisms that reduce tremors. Furthermore, it is possible that  
68 genes that are targeted by both drugs are implicated in ET pathophysiology and could allow for  
69 the identification of genes harbouring putative ET causing variants.

70

71 In this study, we identified convergent transcriptomic targets of primidone and propranolol in  
72 cortical neural progenitor cells (NPC) and cerebellar medulloblastoma cells (DAOY). Common  
73 cellular pathways affected by both treatments were related to neuronal morphology, axon guidance  
74 as well as cell-cell interactions as revealed by co-expression and pathway enrichment analysis. We  
75 also found that ET drugs specifically affected the expression of genes intolerant to loss-of-function  
76 (LoF) variants, hinting at possible enrichment of such rare LoF variants. Furthermore, with  
77 integration of single-cell data, we find that drug-targeted genes are mostly enriched in non-  
78 neuronal cell types such as endocytes, astrocytes, and oligodendrocytes in both cortical and  
79 cerebellar tissues. Our study identifies new putative ET- and tremor-related genes and informs on  
80 the molecular and cellular basis for tremor-reduction in ET.

81

## 82 **METHODS**

### 83 **Cell culture and drug treatment**

84 DAOY and NPC cells were cultured as previously described<sup>5,11</sup> and treated for 5 days with 20  
85 ng/mL of propranolol or 5 µg/mL of primidone (n = 3 per treatment/cell line). H<sub>2</sub>O- or DMSO  
86 (0.023%)-treated cells were used as controls for propranolol and primidone, respectively. Drug  
87 concentrations were chosen based on previous studies that tested efficient tremor-reducing serum  
88 levels of propranolol and primidone in ET patients<sup>12,13</sup>. A kill curve was used to determine lethal  
89 drug concentrations for DAOY cells and NPCs in culture (Supplementary Table 10-12,  
90 Supplementary Figure 1-2).

91

### 92 **RNA-sequencing and differential expression analysis**

93 RNA was extracted with the RNeasy Mini Kit (Qiagen). cDNA library preparation was done using  
94 NEBNext stranded library preparation protocol (New England Biolabs) with rRNA depletion using  
95 the QIAseq FastSelect rRNA HMR kit. (Qiagen). Samples were sequenced on the Illumina  
96 NovaSeq6000 platform (150bp paired-end reads, 150M reads). FASTQ files were pseudo-aligned  
97 to the Ensembl v102 annotation of the human genome using Salmon v1.4.0<sup>14</sup>. Gene-level  
98 differential expression analysis was done using the R package Sleuth<sup>15</sup>. Only genes with a  
99 minimum of 10 scaled reads per base in 90% of samples were kept to filter out low-count genes.  
100 Cell types and treatments were analyzed separately using the Wald test (WT). The full model for  
101 the WT was:

102 *Differentially expressed genes (DEG) ~ plate + buffer + treatment*

103 MA plots and p-value histograms displayed expected distributions (Supplementary Figure 3,4).  
104 Meta-analysis of gene Z-scores was performed to analyze convergent DEG across cell types and  
105 treatments. Briefly, Z-scores for each gene were calculated and then summed across different  
106 combinations of cell types and treatments using Stouffer's Z method<sup>16</sup>. Multiple analyses were  
107 performed notably propranolol specific effect across cell types (labeled 'prop'; Supplementary  
108 table 6), primidone effect across cell types ('prim'; Supplementary table 7), convergent  
109 propranolol and primidone effect in each cell type ('daoy' and 'npc'; Supplementary tables 8 and  
110 9 respectively) and convergent primidone and propranolol effects across both cell types ('all';  
111 Supplementary table 5). False discovery rate was controlled for using the Benjamini-Hochberg  
112 procedure (q-value threshold < 0.05). At least 3 DEGs with highest fold-change per condition were  
113 validated using TaqMan qPCR probes (Supplementary Table 13).

114

115 **WGCNA, co-expression and pathway enrichment**

116 WGCNA was done using the R package<sup>17</sup>. DAOY and NPC sequencing results were analyzed  
117 separately, merging both primidone and propranolol treatments in the analysis. Normalized TPM  
118 values obtained from Sleuth ('sleuth\_to\_matrix') were used for the analysis. To filter out noisy  
119 low-count genes, only genes with a minimum of 10 TPM in 47% of samples were kept, for a final  
120 list of 8549 genes in DAOYs and 9260 genes for NPC. Two outlier samples ('DAOY\_PRIM\_03'  
121 and 'NPC\_PRIM\_02') were removed from the analysis based on sample clustering dendrogram.  
122 Fisher's exact test was used to calculate gene-module p-values. Co-expression analysis was  
123 performed using GeneNetwork2.0<sup>18</sup>. Pathway enrichment analysis was done using the gprofiler R  
124 package<sup>19</sup>. Briefly, gene-lists were made from convergent DEGs across multiple conditions (both  
125 drugs in DAOYs or NPCs, propranolol or primidone in both cells, both drugs in both cells).  
126 Custom background used in gprofiler comprised genes expressed in either DAOYs, NPCs or both  
127 when pertinent. The g:SCS algorithm was used for multiple testing correction (q-value threshold  
128 < 0.1).

129

### 130 **Correlation with ET TWAS summary statistics**

131 ET TWAS summary statistics were obtained from Liao et al. (2021; unpublished results). A  
132 generalized linear model was used to measure the strength of association between gene-level drug  
133 Z-scores and TWAS Z-scores, controlling for gene length and gene GC content ('lm' function in  
134 R). Weighted Z-scores were also used to account for significance of effect. The formula used were:

$$135 \quad TWAS.Z = Drug.Z + Gene\ length + GC\ content$$

136 And for the weighted Z-score analysis:

$$137 \quad TWAS.Z^2 = Drug.Z^2 + Gene\ length + GC\ content$$

138 Association p-values were corrected for multiple testing using Benjamini-Hochberg (q-value  
139 threshold < 0.05).

140

### 141 **Single cell enrichment analysis**

142 A one sample Z-test was used to test enrichment of drug-targeted genes as described previously<sup>20</sup>.

143 An ET gene-set was curated from genes associated with ET from linkage, whole-exome, GWAS

144 and transcriptomic studies <sup>2,10</sup>. Drug gene-sets were made from convergent DEGs (FDR < 0.05)

145 across different conditions (DAOY, NPC, propranolol, primidone, all conditions). Adult

146 cerebellum single-nucleus RNA sequencing data was obtained from Lake et al. (2018; GEO

147 accession: [GSE97930](https://www.ncbi.nlm.nih.gov/geo/query/acc.cgi?acc=GSE97930))<sup>21</sup>. Average cell counts per cell-type were obtained using Seurat v4.0.1<sup>22</sup>.

148 Trimmed means per cell-type from adult cortex single-cell RNA-sequencing were obtained from

149 the Allen Brain Atlas Smart-seq multiple cortical regions dataset<sup>23</sup>. To account for drop-out rates

150 and reduce zero-inflation of the single-cell count matrices, low average count genes were filtered

151 out in both cerebellum (< 0.5 counts in 7/10 cell types) and cortex (<1 count in 85/121 cell types).

152 Single sample Z-tests were used to obtain cell-type specific enrichment Z-scores:

$$153 \quad Z - score = \frac{Mean\ geneset\ counts - Mean\ cell\ type\ expression\ counts}{Geneset\ standard\ deviation * \sqrt{Number\ of\ genes\ in\ geneset}}$$

154

### 155 **Loss-of-function analysis**

156 The distribution of mutational constraint scores for drug DEGs was assessed using pLoF o/e ratio

157 scores obtained from gnomAD<sup>24</sup>. pLof scores for convergent genes across all conditions with q-

158 val <0.05 were compared all protein coding genes passing QC from the Sleuth differential

159 expression analysis. To account for coding sequence length and gene GC percentage, propensity

160 score matching with replacement was used (matchIT package in R<sup>25</sup>) to measure pLoF score

161 distribution differences between DE drug genes and all protein coding genes included in the meta-  
162 analysis. Nearest neighbor matching with the maximum number of matches (ratio = 1:43) between  
163 non-DEGs and DEGs was used. A Wilcoxon unpaired test was done on the matched data. The  
164 same methods were used to assess pLoF score differences of upregulated (match ratio = 1:57) and  
165 downregulated (match ratio = 1:178) DEGs with all protein coding genes.

166

## 167 **RESULTS**

### 168 **Differential expression following propranolol and primidone treatment**

169 To assess the transcriptomic effect of propranolol and primidone on neuronal and cerebellar cells,  
170 NPCs and DAOYs were independently treated with clinically relevant concentrations of both  
171 drugs for five days. Treatment of DAOYs with propranolol resulted in 1,754 DE genes  
172 (Supplementary Table 1) while treatment of NPCs resulted in 1,571 DE genes (Supplementary  
173 Table 2). Directionality of overall transcriptional effect was widely different between NPCs and  
174 DAOYs, with propranolol treatment resulting in mostly overexpression in DAOYs and  
175 underexpression in NPCs (Figure 1C and 1D). Pearson correlation of propranolol-treated NPCs  
176 and DAOYs effectively show a strong negative correlation, indicating opposite transcriptomic  
177 effects on the same genes ( $r = -0.35$ ,  $p\text{-val} < 2.2E-308$ , Figure 1A). However, this correlation  
178 weakens when weighing for the most significant DEGs ( $r = -0.283$ ,  $p = 7.1E-214$ , Figure 1B).  
179 Primidone, on the other hand, had a weak effect on transcription in both NPCs and DAOYs with  
180 only 200 (Supplementary table 4) and 23 DEGs (Supplementary table 3) in each, respectively. In  
181 NPCs, propranolol and primidone DEGs were lowly correlated ( $r = -0.06$ ,  $p\text{-val} = 1.6E-11$ , Figure  
182 1A) with a weaker weighted correlation ( $r = -0.021$ ,  $p\text{-val} = 2.2E-02$ , Figure 1B). Similar weak



183 (weighted and unweighted) correlations are seen between the two drugs in DAOYs (Figure 1A  
184 and 1B).

185

### 186 **ET drug targets converge on genes related to movements disorders and ET**

187 Shared effects of propranolol and primidone on specific genes increases the likelihood of these  
188 genes being integral to tremor reduction in ET. Therefore, convergence of drug effects on  
189 expression was assessed by comparing gene Z-scores from different treatment conditions:  
190 convergent drug targets in either DAOYs or NPCs, convergent propranolol or primidone targets  
191 in both cell types and convergent targets of both drugs in all cell types.

192 Across DAOYs and NPCs, 788 significant convergent DEGs were found with propranolol  
193 treatment (Supplementary table 6) and 36 convergent DEGs following primidone treatment  
194 (Supplementary table 7). Propranolol, in both cell types, increased expression of *TRAPPC11*, a  
195 trafficking protein previously associated with ET<sup>26</sup> (z-score = 5.41, p-val = 5.87E-06). Propranolol  
196 also decreased expression of *G3BP1* (z = -9.07, q-val = 7.84E-17), which encodes a protein  
197 implicated in stress granule formation and is known to affect axonal mRNA translation as well as  
198 nerve regeneration<sup>27</sup>. *BRD2*, a transcription factor previously implicated with epilepsy, was  
199 upregulated following propranolol treatment in both cells (z = 21.13, q-val = 4.56E-95). *NONO*  
200 (z = 6.93, q-val = 3.69E-09), a gene harbouring a splicing variant known to cause X-linked  
201 intellectual deficiency with intentional tremor, was found to be upregulated<sup>28</sup>. Primidone, across  
202 NPCs and DAOYs, upregulated *VCAMI* (z-score = 5.53, p-value = 1.29E-04), a gene implicated  
203 in axonal myelination by oligodendrocytes<sup>29</sup>. *GIPC1* was also found to be downregulated  
204 following primidone treatment in both cell types (z = -5.46, q-val = 1.42E-04). *GIPC1* is a known  
205 interactor of *DRD3* which has previously been associated with ET and Parkinson's (PD)<sup>2,30,31</sup>.

206

207 **Propranolol and primidone act on pathways related to neuronal survival as well as axon**  
208 **guidance**

209 Following the identification of convergent DEGs across treatments, we wanted to identify  
210 molecular pathways affected by propranolol and primidone in DAOYs and NPCs. Co-expression  
211 enrichment analysis (using GeneNetwork2.0<sup>18</sup>) for convergent DEGs across all conditions showed  
212 that Reactome terms related to GPCR signalling (p-val = 1.12E-19), axon guidance (p-val = 1.68E-  
213 08), Semaphorin interactions (p-val = 3.24E-13) and VEGF signalling (p-val = 2.23E-08) were  
214 significantly enriched within the convergent genesets (Supplementary Table 14). Furthermore,  
215 Ca<sup>2+</sup> signalling (p-val = 4.67E-07) and voltage-gated potassium channels (p-val = 4.64E-06) were  
216 also found to be significantly enriched. Interestingly, GO:cellular components significant terms  
217 were mostly related to cell:cell or cell:extracellular matrix interactions as well as axon guidance  
218 such as lamellipodium (p-val = 4.47E-13), filopodium (p-val = 3.54E-11, focal adhesion (p-val =  
219 4.70E-11) and growth cone (p-val = 1.04E-09)(Supplementary table 16).

220 Pathway enrichment analysis of convergent propranolol DEGs (in both cell types) was also  
221 performed using g:profiler using genes expressed in both DAOYs and NPCs as background (Table  
222 1). Pathways known to be affected by propranolol such as HIF-1 $\alpha$  (p-val = 0.001) and regulation  
223 of apoptosis (p-val = 0.02) were significantly enriched. Much like the co-expression analysis,  
224 Reactome terms related to axon guidance were found to be significant, such as RUNX1  
225 transcription (p-val = 0.0002), a transcription factor implicated in growth cone guidance of DRG  
226 neurons<sup>32</sup>. Interestingly, CaMKK2 signalling pathway was found to be significantly enriched

227 within genes in the propranolol geneset. *CAMKK2* encodes a kinase implicated in synapse  
228 homeostasis and is also involved in modifying A $\beta$  synaptotoxicity in Alzheimer's disease<sup>33</sup>.  
229 Weighted gene correlation network analysis was also performed to identify co-expression modules  
230 associated with combined propranolol/primidone treatment. Module-trait and module correlation  
231 heatmaps are shown in Figure 2. Two modules (cyan and red; corr = 0.74, p-val = 0.009; corr =  
232 0.73, p-val = 0.01 respectively; Figure 2A) were found to be significantly associated with treatment  
233 in DAOYs and only one module (red; corr = 0.65, p-val = 0.03) was significantly associated with  
234 NPCs (Figure 2B). Pathway enrichment analysis of DAOY red module genes found an enrichment  
235 of Reactome terms related to RABGAP signalling (p-val = 0.009) as well as RUNX1 transcription  
236 (p-val = 0.02; Table 2). NPC red modules genes were significantly associated with neuronal  
237 morphology, axon guidance and neurogenesis (Table 3).

238

### 239 **Correlation of the effects of propranolol and primidone with those of common and rare** 240 **variants in ET**

241 TWAS studies the effect of common SNPs associated with a disease on the expression of genes in  
242 different tissues. We postulated that transcriptomic targets of propranolol and primidone might  
243 correlate with the transcriptomic effect of common ET variants. We used TWAS summary statistic  
244 from an upcoming ET GWAS (Liao et al., unpublished results) to measure the correlation between  
245 TWAS gene Z-scores and convergent drug target Z-scores (across all possible conditions) while  
246 controlling for gene length and GC content. Weak, non-significant correlations between TWAS  
247 Z-scores and drug target Z-scores were found across all conditions and all brain tissues (p > 0.05;  
248 Figure 3A). Cerebellar hemispheres and cerebellum tissues, brain regions highly associated with

249 ET, displayed non-significant negative correlations with convergent drug targets (coeff = -0.0143,  
250 p-val = 0.549; coeff = -0.000138, p-val = 0.994 respectively; Figure 3B).

251

252 We postulated that since propranolol and primidone had a non-significant correlation with  
253 expression of genes harbouring common variants for ET, they might instead act on genes that have  
254 rare variants. GnomAD recently published observed/expected (o/e) loss-of-function (LoF) scores  
255 for all protein coding genes in the genome. These scores inform on the tolerance of genes to rare  
256 LoF variants, with genes with a higher frequency of observed to expected LoF variants being more  
257 tolerant to mutations. Figure 3C shows the distribution of LoF scores of drug DEGs compared to  
258 all protein coding genes passing the initial DE QC. Drug targets displayed a significantly lower  
259 o/e score median (n = 256, median = 0.18) than all protein coding genes (n = 11,188, median =  
260 0.36; W = 1727520, p-val = 1.501E-10) using a Wilcoxon unpaired test. Interestingly, when  
261 looking at fold change direction (figure 3D), upregulated genes (n = 194) had a significantly lower  
262 o/e score median (median = 0.15, W = 1361482, p-value = 2.917E-12) than all protein coding  
263 genes whilst no significant difference was found between o/e scores medians of downregulated  
264 genes (n = 71) and all protein coding genes (median = 0.35, W = 417126, p-value = 0.3246) using  
265 a Wilcoxon unpaired test. Thus, propranolol and primidone increased expression of mutationally  
266 constrained genes in cultured DAOYs and NPCs.

267

### 268 **Single cell enrichment of propranolol and primidone targeted genes**

269 Our current understanding of CNS cell types affected in ET is still very limited. Enrichment of  
270 disease related genes can indirectly inform on potential cell types implicated in disease

271 pathophysiology<sup>20</sup>. We first sought to assess the enrichment of ET genes discovered through  
272 familial linkage studies as well as whole-exome studies in cell types of the adult cerebellum and  
273 cerebral cortex (Figure 4, Supplementary Table 17-18). Enrichment Z-scores per cell type for ET  
274 genes as well as drug DEGs were calculated based on average normalized expression in single  
275 nucleus cerebellum data from Lake et al. (2018)<sup>21</sup> and cortical single-cell Smart-seq data from the  
276 Allen Brain Institute. In the cerebellum, ET genes were mostly enriched in astrocytes (enrichment  
277 z-score = 3.11, q-value = 0.021; Figure 4A and 4B). In the cortex, the strongest enrichments of ET  
278 genes were found in oligodendrocyte progenitor cells (OPCs) (z-score = 3.55) and L3-L5  
279 excitatory neurons with the most significant neuronal cell type being the *FEZF2*-, *DYRK*-  
280 expressing pyramidal neurons of cortical layer V (z-score = 3.28, q-val = 0.0068; Figure 4C).  
281 Significant enrichment was also found in L1 *MTGI* astrocytes (z-score = 3.13, q-val = 0.0090).  
282  
283 Next, we assessed the enrichment of propranolol and primidone DEGs identified in this study in  
284 cortical and cerebellar single-cell data (Figure 5, Supplementary Table 17-18). In cerebellum  
285 single-nucleus data, convergent propranolol DEGs were mostly enriched in endocytes (z-score =  
286 3.38, q-val = 0.014) and microglia (z-score = 3.36, q-val = 0.014) whilst convergent  
287 propranolol/primidone DEGs in all cell types were mostly enriched in oligodendrocytes (z-score  
288 = 2.90, q-val = 0.034; Figure 5E). Interestingly, convergent propranolol/primidone DEGs in  
289 DAOYs, a cell-type specific to the cerebellum, had enriched expression in astrocytes (z-score =  
290 2.74, q-val = 0.047), much like the enrichment of ET genes in cerebellar astrocytes (Figure 4A).  
291 In cortical tissue, convergent drug DEGs were mostly significantly enriched in non-neuronal cell  
292 types (figure 5D), notably oligodendrocytes (z-score = 5.09, q-val = 3.65E-07), astrocytes (z-score.  
293 = 4.92, q-val = 1.00E-04) and endocytes (z-score = 3.95, q-val = 1.70E-03). Unsurprisingly, given

294 the use of propranolol to lower blood pressure, convergent propranolol DEGs were mostly  
295 enriched in endocytes (z-score = 6.18, q-val = 4.48-07) and vascular and leptomeningeal cells  
296 (VLMC; z-score = 4.77, q-val = 1.52E-04). Of note, propranolol DEGs were also enriched in L1-  
297 L3 inhibitory neurons, notably vasoactive intestinal peptide (VIP) expressing inhibitory neurons  
298 (Figure 5D, see Supplementary Table 17 and 18 for statistics).

299

## 300 **DISCUSSION**

301 Understanding the cellular and molecular mechanisms behind drug treatments can inform on  
302 disease pathophysiology. In this study, we sought to investigate the transcriptomic effects of first  
303 line treatments for ET in cerebellar DAOY cells as well as NPCs, to gain insight on potential  
304 disease related genes. We found that propranolol and primidone affected expression of multiple  
305 genes related to movement disorders and ET. Notably, *TRAPPC11*, whose expression was  
306 previously shown to be altered in ET cerebellar cortex and is also involved in protein trafficking<sup>26</sup>.  
307 Other genes related to endosomal trafficking were found to be differentially expressed after  
308 propranolol treatment, such as *MYO1E* and *SYNJ1*. Convergent DEGs also displayed an  
309 enrichment of genes related to the ESCRT complex, known to be a pillar of endosomal trafficking  
310 in neurons. These findings potentially increase the likelihood of endosomal trafficking being  
311 altered in ET and possibly partly restored through transcriptomic effects of propranolol.

312

313 Axon guidance was previously associated with ET in several studies<sup>2,11,26,34,35</sup>. Bulk-RNA  
314 sequencing of cerebellar cortex and dentate nucleus of ET patients showed a significant enrichment  
315 of axon guidance genes<sup>26</sup>. Hallmark axon guidance genes such as *ROBO1* (z-score = 5.87, q-val =  
316 1.88E-06) and *NEO1* (z-score = 4.01, q-val = 5.04E-03) were both found to have increased

317 expression following drug treatment. NEO1 (and its paralog DCC), which binds netrin-1, is  
318 implicated in cell-cell adhesions, mostly between axons and oligodendrocytes, as well as cell-  
319 extracellular matrix adhesions. Netrin-1 also acts on dendrite arborisation, increasing connections  
320 in excitatory synapses<sup>36</sup>. Interestingly, NEO1 protein remains expressed in Purkinje cells of the  
321 adult cerebellum (GTEX V8). Thus, the post-developmental role of axon guidance signalling  
322 pathways is to maintain adhesions and important synaptic connections between cells. This might  
323 be an important process by which ET tremorolytic drugs diminish tremor. These findings on axon  
324 guidance are concordant with other Reactome/GO-terms found to be enriched amongst DEGs,  
325 most notably semaphorin interactions, cadherin binding, and actin cytoskeleton reorganization.  
326 Purkinje cell axons in ET patients have shown accumulations of disordered neurofilaments  
327 ('axonal torpedoes') leading to abnormal axonal morphologies<sup>35</sup>. This process is thought to either  
328 be part of a neurodegenerative cascade or a response to neurodegeneration. Moreover, decreased  
329 neuronal density was observed in multiple brain regions of ET patients, most notably the inferior  
330 cerebellar peduncles through which afferent axons from the brainstem nuclei pass in order to reach  
331 the cerebellar cortex<sup>37</sup>. Our findings therefore provide additional support for the involvement of  
332 axon guidance molecules in ET pathophysiology.

333  
334 We also identified the CaMKK2 signalling pathway as significantly enriched in propranolol DEGs  
335 in DAOYs and NPCs. CaMKK2 exacerbates A $\beta$ 42 synaptotoxicity in Alzheimer's disease through  
336 Tau protein phosphorylation by AMPK<sup>33</sup>. This pathway is sensitive to cellular calcium intake,  
337 which was shown to be affected at the transcriptome level by both propranolol and primidone.  
338 Both Tau protein and amyloid-beta abnormalities have been observed in ET cerebellar tissues,  
339 with multiple findings pointing towards protein aggregation being a hallmark of the disease<sup>38,39</sup>.

340 Propranolol affecting transcription of genes implicated in both CAMKK2 and Ca<sup>2+</sup> signalling  
341 pathways might imply that ET drugs could reduce aggregate-induced neurotoxicity.

342

343 Convergent drug DEGs did not correlate with transcriptomic effects of common ET variants  
344 (TWAS DEGs). Moreover, propranolol and primidone DEGs displayed weak non-significant  
345 correlations with gene expression in the cerebellum of ET patients, the principal brain region  
346 affected in this disorder<sup>1</sup>. There are several possible explanations for these results. The relatively  
347 underpowered state (for a common disease) of the current ET GWAS might not capture the effects  
348 of common variation on transcription, in part explaining the absence of correlation with drug  
349 DEGs. Moreover, the lack of good cell models for cerebellar neurons as well as the  
350 neurodevelopmental state of NPCs also impair adequate comparisons between TWAS statistics  
351 and drug DEGs presented in this study.

352

353 Convergent drug DEGs are significantly more likely to be genes predicted to be intolerant to LoF  
354 variants. Mutationally constrained genes are more likely to be essential for cell homeostasis and  
355 survival and thus more likely to be implicated in disease when affected by LoF mutations<sup>24</sup>. Given  
356 that both ET drugs converged on these genes in multiple cell types increases the likelihood that  
357 these genes harbour rare variants associated with ET. Upregulated DEGs were found to be  
358 significantly less tolerant than all protein coding genes while downregulated DEGs were as tolerant  
359 as all protein coding genes. These genes could be good candidates for future targeted sequencing,  
360 especially within propranolol and primidone responsive cohorts.

361



362 Identifying cell types affected in ET remains difficult. Several conflicting studies have tried to  
363 identify specific pathological morphologies in post-mortem cerebellum of ET patients, most  
364 notably in Purkinje cells, yet no defining histopathological markers have been found<sup>35</sup>. Here we  
365 sought to identify the relevant ET cell types by assessing the enrichment of variant-harboring ET  
366 genes within single cells in cerebellar and cortical tissues. Expression of ET genes were mostly  
367 enriched within L3-L5 excitatory neurons in the cerebral cortex, more specifically *FEZF2* L5  
368 glutamatergic pyramidal neurons<sup>40</sup>. These neurons originate in the primary motor cortex (M1) and  
369 form the corticospinal tract that projects to lower motor neurons, which controls conscious  
370 movements. These neurons are influenced by multiple cortico-cortical pathways but also input  
371 from the cerebellothalamic tract, crucial for movement coordination. The primary motor cortex  
372 has previously been shown to be important for tremor generation in ET as subdural stimulation of  
373 M1 can reduce tremor intensity in patients<sup>41</sup>. Moreover, propranolol-targeted genes were mostly  
374 enriched in VIP-expressing inhibitory neurons of L1-L3. These neurons are known to inhibit motor  
375 neurons through different cortical pathways<sup>42</sup>. The enrichment of ET genes within M1 pyramidal  
376 neurons coupled with the enrichment of ET drug genes in motor neuron-inhibiting cells does  
377 suggest new potential cellular mechanisms through which tremor generation (and/or reduction)  
378 occurs in ET.

379

380 In the cerebellum, both ET genes and convergent drug DEGs were significantly enriched within  
381 astrocytes in the cerebellum. This somewhat contradicts previous histopathological findings  
382 postulating that Purkinje cells were the defining cell type in ET pathophysiology. Not much is  
383 known about the role of astrocytes in ET but based on other neurodegenerative diseases, it could  
384 be argued that they may play an important role in the onset or development of the disease<sup>35</sup>.

385 Oligodendrocytes, whose dysfunction contributes to numerous other neurological diseases, also  
386 showed an enrichment of propranolol and primidone-targeted genes. Both astrocytes and  
387 oligodendrocytes might be targeted by ET drugs to reduce tremor since non-neuronal cell types  
388 are known to be involved in neurodegeneration in numerous diseases<sup>43</sup>. The lack of single-cell data  
389 on ET tissues is a limitation in the study of this disease but our results highlight a possible role for  
390 non-neuronal cells in the cerebellum in ET.

391  
392 This study has a number of limitations. Propranolol and primidone are known to act on cell  
393 excitability and this effect was postulated as being important for tremor reduction in ET. Given  
394 that DAOYs and NPCs are non-excitabile, it is very hard to assess the electrophysiological effects  
395 of these drugs in these cells. Moreover, the electrophysiological effects of drugs on cells are known  
396 to influence transcription<sup>44</sup>. This might explain why primidone had such a mild effect on  
397 transcription in both DAOYs and NPCs. Cells used in this study do not represent the complete  
398 range of cell types in the cortex and cerebellum. NPCs do not completely replicate neuronal  
399 expression and do have a more neurodevelopmental transcriptomic state. DAOYs, on the other  
400 hand, are derived from cancerous cells and do have dysregulated expression of genes related to  
401 cell division and cell growth. Nevertheless, this study only serves as an ET drug effect screen and  
402 remains a steppingstone for more in-depth studies.

403  
404 Our study identifies multiple cellular and molecular pathways implicated in ET pathophysiology  
405 and tremor reduction by both propranolol and primidone. Our findings also suggest a role for genes  
406 harbouring potentially rare, deleterious variants associated with ET. Targeted sequencing of these  
407 convergent drug genes in case-control cohorts could help to confirm or infirm this hypothesis.

408 These genes could also be used as biomarkers for propranolol treatment in responsive ET patients.  
409 Our results also identify several cell types involved in ET in both cerebellar and cortical tissues.  
410 We also identify cell types potentially affected by propranolol and primidone through which  
411 tremor might be reduced in ET. Future studies will be needed to further identify the transcriptomic  
412 and electrophysiological effects of both drugs, possibly using more representative neuronal models  
413 such as iPSC-derived Purkinje cells, non-neuronal cell types as well as motor neurons. Moreover,  
414 single-cell experiments studying the transcriptomic effects of ET drugs on patient-derived tissues  
415 will be required to understand the complex nature of this disease.

416

## 417 REFERENCES

- 418 1. Haubenberger D, Hallett M. Essential Tremor. *N Engl J Med*. 2018;378(19):1802-1810.  
419 doi:10.1056/NEJMc1707928
- 420 2. Houle G, Dion PA, Rouleau GA. Molecular Genetics of Essential Tremor. *eLS*. June  
421 2018:1-8. doi:doi:10.1002/9780470015902.a0028103
- 422 3. Ruderfer DM, Charney AW, Readhead B, et al. Polygenic overlap between schizophrenia  
423 risk and antipsychotic response: A genomic medicine approach. *The Lancet Psychiatry*.  
424 2016. doi:10.1016/S2215-0366(15)00553-2
- 425 4. So HC, Chau CKL, Chiu WT, et al. Analysis of genome-wide association data highlights  
426 candidates for drug repositioning in psychiatry. *Nat Neurosci*. 2017. doi:10.1038/nn.4618
- 427 5. Khayachi A, Ase AR, Liao C, et al. Chronic lithium treatment alters the  
428 excitatory/inhibitory balance of synaptic networks and reduces mGluR5-PKC signaling.  
429 *bioRxiv*. January 2020:2020.09.18.303578. doi:10.1101/2020.09.18.303578
- 430 6. Ferreira JJ, Mestre TA, Lyons KE, et al. MDS evidence-based review of treatments for

- 431 essential tremor. *Mov Disord.* 2019. doi:10.1002/mds.27700
- 432 7. Morgan MH, Hewer RL, Cooper R. Effect of the beta adrenergic blocking agent  
433 propranolol on essential tremor. *J Neurol Neurosurg Psychiatry.* 1973.  
434 doi:10.1136/jnnp.36.4.618
- 435 8. Langley A, Pope E. Propranolol and central nervous system function: Potential  
436 implications for paediatric patients with infantile haemangiomas. *Br J Dermatol.* 2015.  
437 doi:10.1111/bjd.13379
- 438 9. Laurens C, Abot A, Delarue A, Knauf C. Central effects of beta-blockers may be due to  
439 nitric oxide and hydrogen peroxide release independently of their ability to cross the  
440 blood-brain barrier. *Front Neurosci.* 2019. doi:10.3389/fnins.2019.00033
- 441 10. Liao C, Sarayloo F, Rochefort D, et al. Multiomics Analyses Identify Genes and Pathways  
442 Relevant to Essential Tremor. *Mov Disord.* 2020. doi:10.1002/mds.28031
- 443 11. Liao C, Sarayloo F, Vuokila V, et al. Transcriptomic changes resulting from STK32B  
444 overexpression identifies pathways potentially relevant to essential tremor. *bioRxiv.* 2019.  
445 doi:10.1101/552901
- 446 12. Jefferson D, Jenner-P., Marsden CD. Relationship between plasma propranolol  
447 concentration and relief of essential tremor. *J Neurol Neurosurg Psychiatry.* 1979.  
448 doi:10.1136/jnnp.42.9.831
- 449 13. Hedera P, Cibulčík F, Davis TL. Pharmacotherapy of Essential Tremor. *J Cent Nerv Syst*  
450 *Dis.* 2013. doi:10.4137/jcnsd.s6561
- 451 14. Patro R, Duggal G, Love MI, Irizarry RA, Kingsford C. Salmon: fast and bias-aware  
452 quantification of transcript expression using dual-phase inference. *Nat Methods.*  
453 2017;14(4):417. doi:10.1038/NMETH.4197

- 454 15. Pimentel H, Bray NL, Puente S, Melsted P, Pachter L. Differential analysis of RNA-seq  
455 incorporating quantification uncertainty. *Nat Methods*. 2017. doi:10.1038/nmeth.4324
- 456 16. Zaykin D V. Optimally weighted Z-test is a powerful method for combining probabilities  
457 in meta-analysis. *J Evol Biol*. 2011. doi:10.1111/j.1420-9101.2011.02297.x
- 458 17. Langfelder P, Horvath S. WGCNA: An R package for weighted correlation network  
459 analysis. *BMC Bioinformatics*. 2008;9. doi:10.1186/1471-2105-9-  
460 559/EMAIL/CORRESPONDENT/C1/NEW
- 461 18. P D, S van D, JC H, et al. Improving the diagnostic yield of exome- sequencing by  
462 predicting gene-phenotype associations using large-scale gene expression analysis. *Nat*  
463 *Commun*. 2019;10(1). doi:10.1038/S41467-019-10649-4
- 464 19. Raudvere U, Kolberg L, Kuzmin I, et al. g:Profiler: a web server for functional enrichment  
465 analysis and conversions of gene lists (2019 update). *Nucleic Acids Res*. 2019;(1).  
466 doi:10.1093/nar/gkz369
- 467 20. Aldinger KA, Thomson Z, Phelps IG, et al. Spatial and cell type transcriptional landscape  
468 of human cerebellar development. *Nat Neurosci* 2021 248. 2021;24(8):1163-1175.  
469 doi:10.1038/s41593-021-00872-y
- 470 21. Lake BB, Chen S, Sos BC, et al. Integrative single-cell analysis of transcriptional and  
471 epigenetic states in the human adult brain. *Nat Biotechnol*. 2018;36(1):70.  
472 doi:10.1038/NBT.4038
- 473 22. Hao Y, Hao S, Andersen-Nissen E, et al. Integrated analysis of multimodal single-cell  
474 data. *Cell*. 2021;184(13):3573-3587.e29. doi:10.1016/J.CELL.2021.04.048
- 475 23. Hawrylycz MJ, Lein ES, Guillozet-Bongaarts AL, et al. An anatomically comprehensive  
476 atlas of the adult human brain transcriptome. *Nat* 2012 4897416. 2012;489(7416):391-

- 477 399. doi:10.1038/nature11405
- 478 24. Karczewski KJ, Francioli LC, Tiao G, et al. The mutational constraint spectrum quantified  
479 from variation in 141,456 humans. *Nature*. 2020. doi:10.1038/s41586-020-2308-7
- 480 25. Ho D, Imai K, King G, Stuart EA. MatchIt: Nonparametric Preprocessing for Parametric  
481 Causal Inference. *J Stat Softw*. 2011;42(1):1-28. doi:10.18637/JSS.V042.I08
- 482 26. Liao C, Sarayloo F, Rochefort D, et al. Multi-omics integration of the phenome,  
483 transcriptome and genome highlights genes and pathways relevant to essential tremor.  
484 *bioRxiv*. January 2019:580753. doi:10.1101/580753
- 485 27. Sahoo PK, Lee SJ, Jaiswal PB, et al. Axonal G3BP1 stress granule protein limits axonal  
486 mRNA translation and nerve regeneration. *Nat Commun*. 2018. doi:10.1038/s41467-018-  
487 05647-x
- 488 28. Mircescu D, Langouët M, Rio M, et al. Mutations in NONO lead to syndromic intellectual  
489 disability and inhibitory synaptic defects. *Nat Neurosci*. 2015. doi:10.1038/nn.4169
- 490 29. Miyamoto Y, Torii T, Tanoue A, Yamauchi J. VCAM1 acts in parallel with CD69 and is  
491 required for the initiation of oligodendrocyte myelination. *Nat Commun*. 2016.  
492 doi:10.1038/ncomms13478
- 493 30. Lorenz D, Klebe S, Stevanin G, et al. Dopamine receptor D3 gene and essential tremor in  
494 large series of German, Danish and French patients. *Eur J Hum Genet*. 2009.  
495 doi:10.1038/ejhg.2008.243
- 496 31. Arango-Lievano M, Sensoy O, Borie A, et al. A GIPC1-Palmitate Switch Modulates  
497 Dopamine Drd3 Receptor Trafficking and Signaling. *Mol Cell Biol*. 2016.  
498 doi:10.1128/mcb.00916-15
- 499 32. Yoshikawa M, Senzaki K, Yokomizo T, Takahashi S, Ozaki S, Shiga T. Runx1 selectively

- 500 regulates cell fate specification and axonal projections of dorsal root ganglion neurons.  
501 *Dev Biol.* 2007;303(2):663-674. doi:10.1016/J.YDBIO.2006.12.007
- 502 33. G M-C, J C, S P, V C, A M, F P. The CAMKK2-AMPK kinase pathway mediates the  
503 synaptotoxic effects of A $\beta$  oligomers through Tau phosphorylation. *Neuron.*  
504 2013;78(1):94-108. doi:10.1016/J.NEURON.2013.02.003
- 505 34. Hor H, Francescato L, Bartesaghi L, et al. Missense mutations in TENM4, a regulator of  
506 axon guidance and central myelination, cause essential tremor. *Hum Mol Genet.* 2015.  
507 doi:10.1093/hmg/ddv281
- 508 35. Louis ED, Faust PL. Essential tremor pathology: neurodegeneration and reorganization of  
509 neuronal connections. *Nat Rev Neurol.* 2020. doi:10.1038/s41582-019-0302-1
- 510 36. Sun KLW, Correia JP, Kennedy TE. Netrins: Versatile extracellular cues with diverse  
511 functions. *Development.* 2011. doi:10.1242/dev.044529
- 512 37. Prasad S, Pandey U, Saini J, Ingahalikar M, Pal PK. Atrophy of cerebellar peduncles in  
513 essential tremor: a machine learning-based volumetric analysis. *Eur Radiol.* 2019.  
514 doi:10.1007/s00330-019-06269-7
- 515 38. E B, C T, É A-L, et al. Accumulation of amyloid- $\beta$  in the cerebellar cortex of essential  
516 tremor patients. *Neurobiol Dis.* 2015;82:397-408. doi:10.1016/J.NBD.2015.07.016
- 517 39. Kim SH, Farrell K, Cosentino S, et al. Tau Isoform Profile in Essential Tremor Diverges  
518 From Other Tauopathies. *J Neuropathol Exp Neurol.* August 2021.  
519 doi:10.1093/JNEN/NLAB073
- 520 40. Tantirigama MLS, Oswald MJ, Duynstee C, Hughes SM, Empson RM. Expression of the  
521 Developmental Transcription Factor Fezf2 Identifies a Distinct Subpopulation of Layer 5  
522 Intratelencephalic-Projection Neurons in Mature Mouse Motor Cortex. *J Neurosci.*

- 523 2014;34(12):4303-4308. doi:10.1523/JNEUROSCI.3111-13.2014
- 524 41. Moro E, Schwab JM, Piboolnurak P, et al. Unilateral subdural motor cortex stimulation  
525 improves essential tremor but not Parkinson's disease. *Brain*. 2011;134(7):2096-2105.  
526 doi:10.1093/BRAIN/AWR072
- 527 42. Pfeffer CK, Xue M, He M, Huang ZJ, Scanziani M. Inhibition of inhibition in visual  
528 cortex: the logic of connections between molecularly distinct interneurons. *Nat Neurosci*  
529 *2013 168*. 2013;16(8):1068-1076. doi:10.1038/nn.3446
- 530 43. Vahsen BF, Gray E, Thompson AG, et al. Non-neuronal cells in amyotrophic lateral  
531 sclerosis — from pathogenesis to biomarkers. *Nat Rev Neurol 2021 176*. 2021;17(6):333-  
532 348. doi:10.1038/s41582-021-00487-8
- 533 44. Ribeiro EA, Salery M, Scarpa JR, et al. Transcriptional and physiological adaptations in  
534 nucleus accumbens somatostatin interneurons that regulate behavioral responses to  
535 cocaine. *Nat Commun 2018 91*. 2018;9(1):1-10. doi:10.1038/s41467-018-05657-9



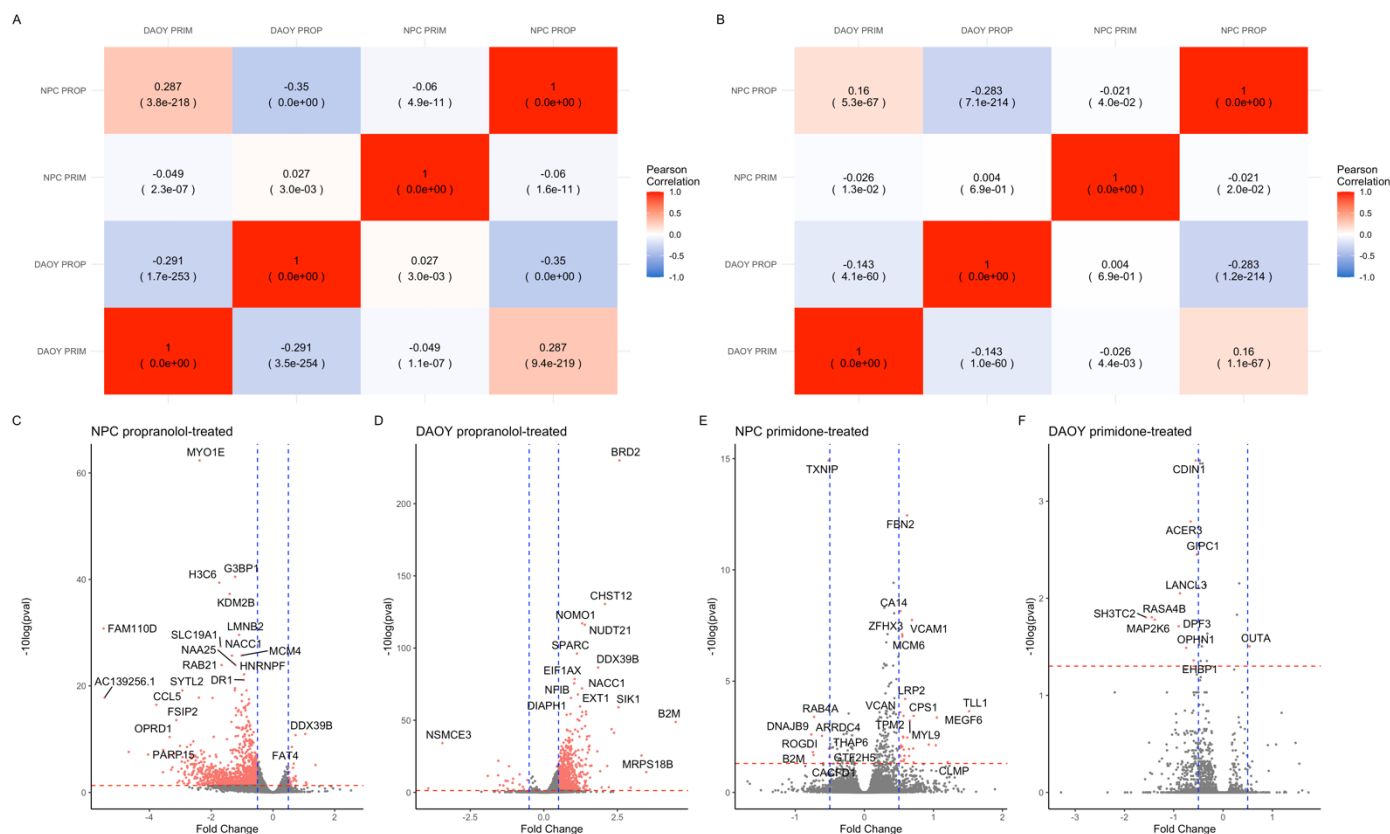

536

537 **Figure 1. Correlation between DAOYs and NPCs treated with propranolol and primidone.**

538 A. Unweighted Pearson correlations between DEGs z-scores from different conditions of

539 treatment and cell types. B. Weighted Pearson correlations between DEGs z-scores from different

540 conditions of treatment and cell types. C-F. Volcano plots of propranolol-treated NPCs (C) and

541 DAOYs (D) as well as primidone-treated NPCs (E) and DAOYs (F). Blue lines indicate -0.5- and

542 0.5-fold changes. Red lines indicate q-value significance threshold (0.05).

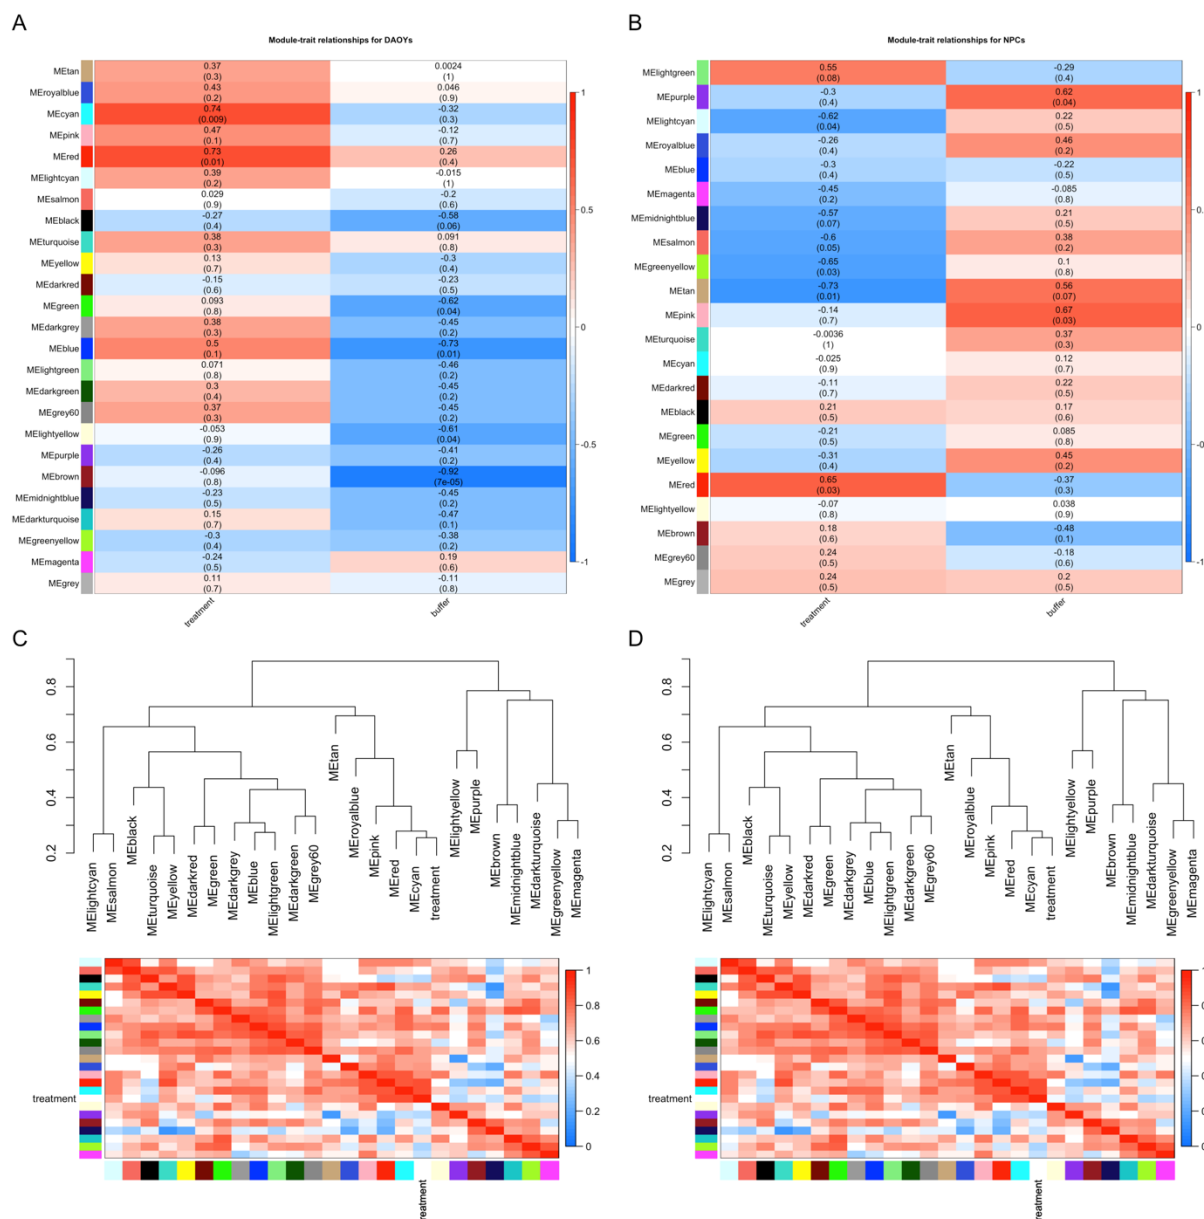

543  
 544 **Figure 2. Co-expression gene modules for convergent propranolol and primidone targets. A.**  
 545 Module-treatment (propranolol/primidone) and -buffer (H2O/DMSO; control) correlation  
 546 heatmaps for DAOYs. B. Module-treatment (propranolol/primidone) and -buffer (H2O/DMSO;  
 547 control) correlation heatmaps for NPCs. Value indicates correlation between gene-trait and gene-  
 548 module associations with p-value in parenthesis. C. Module dendrograms with module

549 membership correlation heatmaps for DAOYs. D. Module dendrograms with module membership  
 550 correlation heatmaps for NPCs.  
 551

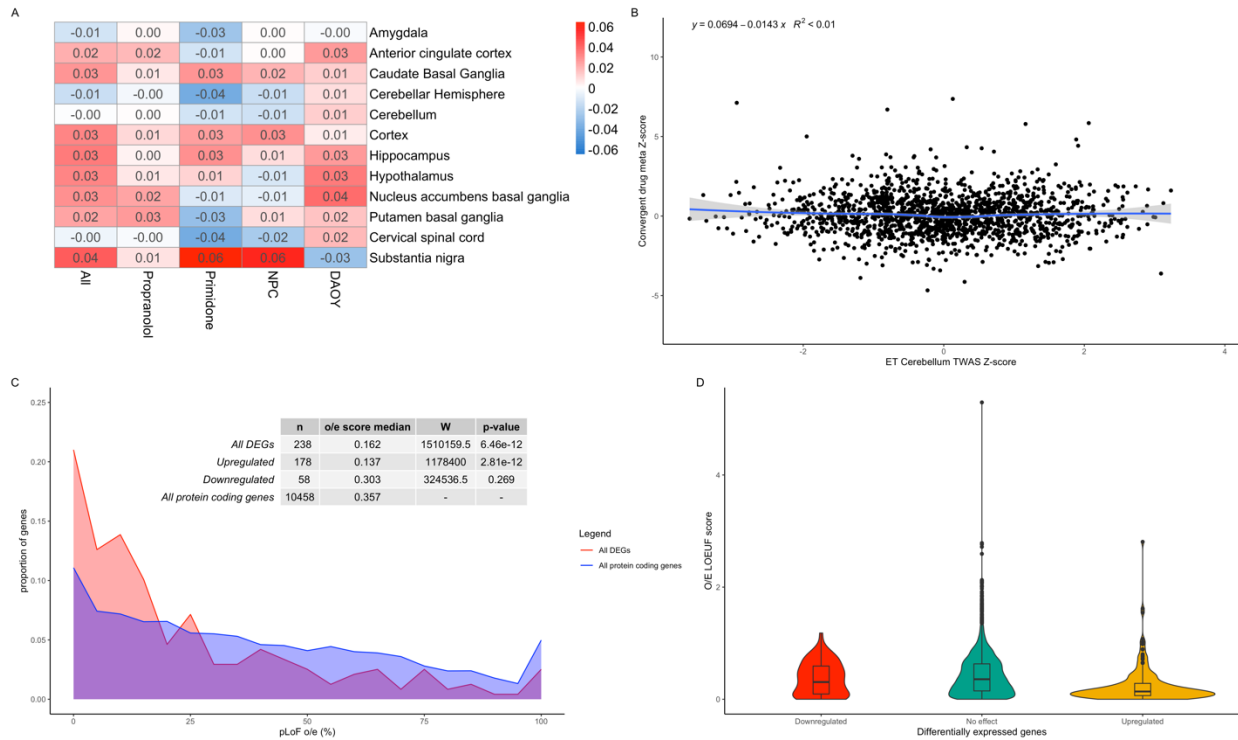

552  
 553 **Figure 3. Effects of ET drugs on common and rare variants.** A. Correlation heatmap of ET  
 554 TWAS gene Z-scores in different brain tissues and drug effect gene Z-scores from different  
 555 meta-analysis conditions. Values indicate Z-score regression coefficient from linear model. B.  
 556 Correlation plot of TWAS gene Z-scores from cerebellar tissue and convergent primidone and  
 557 propranolol gene Z-scores across DAOYs and NPCs. C. Line histogram displaying the  
 558 distribution of O/E LOEUF scores from all protein coding genes (blue) and convergent DEGs  
 559 (red) following drug treatment. O/E scores were directly transformed to percentages (ex. 0.25 as  
 560 25%) with scores over 10 counted as 100%. D. Violin plots of O/E LOEUF scores for  
 561 upregulated DEGs (yellow), downregulated DEGs (red) and non-significant DEGs (green).  
 562

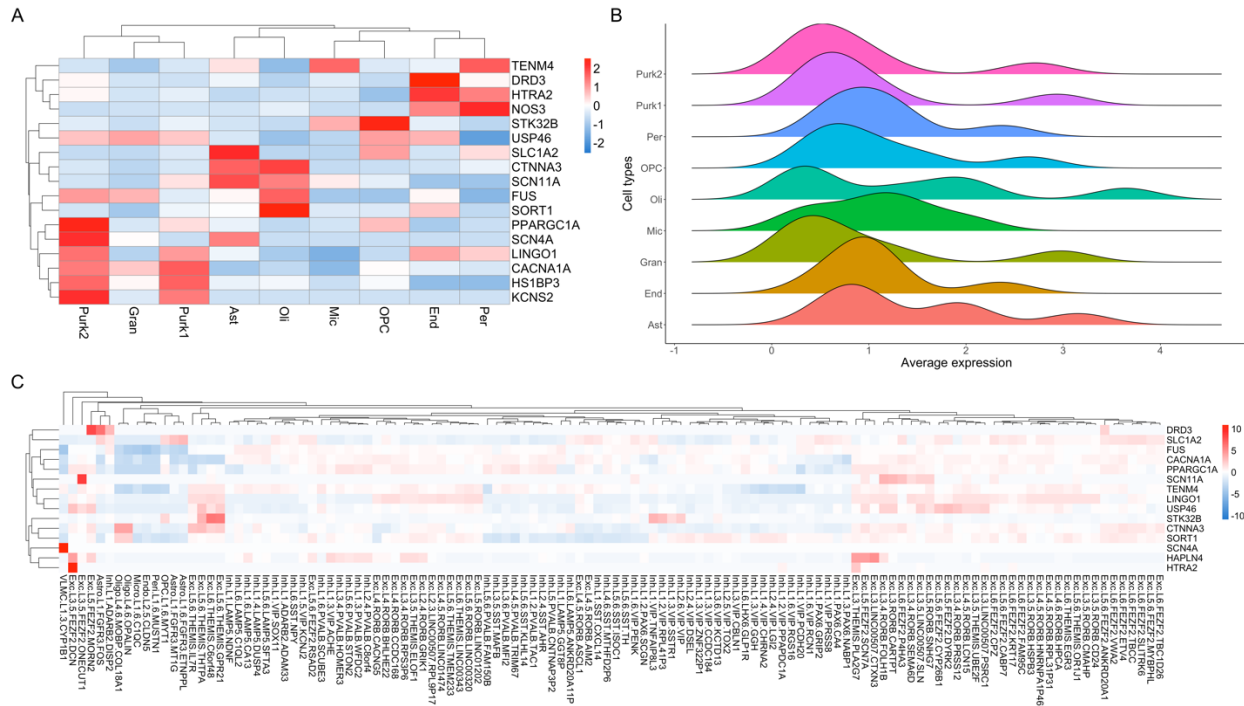

563  
 564 **Figure 4. Single-cell enrichment of ET genes in cerebellar and cortical tissues.** A. Single-cell  
 565 enrichment Z-score heatmap of ET-related genes in adult cerebellar tissue. Rows represent ET  
 566 genes; Columns represent cell types of the cerebellum (Purk1 = SORC3+ Purkinje cells, Purk2 =  
 567 SORC3- Purkinje cells, Ast = Astrocytes, OPC = Oligodendrocyte progenitor cells, Oli =  
 568 Oligodendrocytes, Mic =Microglia, End = Endocytes, Gran = Granule cells, Per = Pericytes). B.  
 569 Ridge plots displaying distribution of average expression counts of ET-related genes in different  
 570 cell types of the adult cerebellum. C. Z-score expression heatmap of ET genes in single-cell types  
 571 of the adult cortex. Rows represent ET genes; Columns represent cortical cell types (Exc =  
 572 Excitatory, Inh = Inhibitory, L# = cortical layer, Astro = Astrocytes).

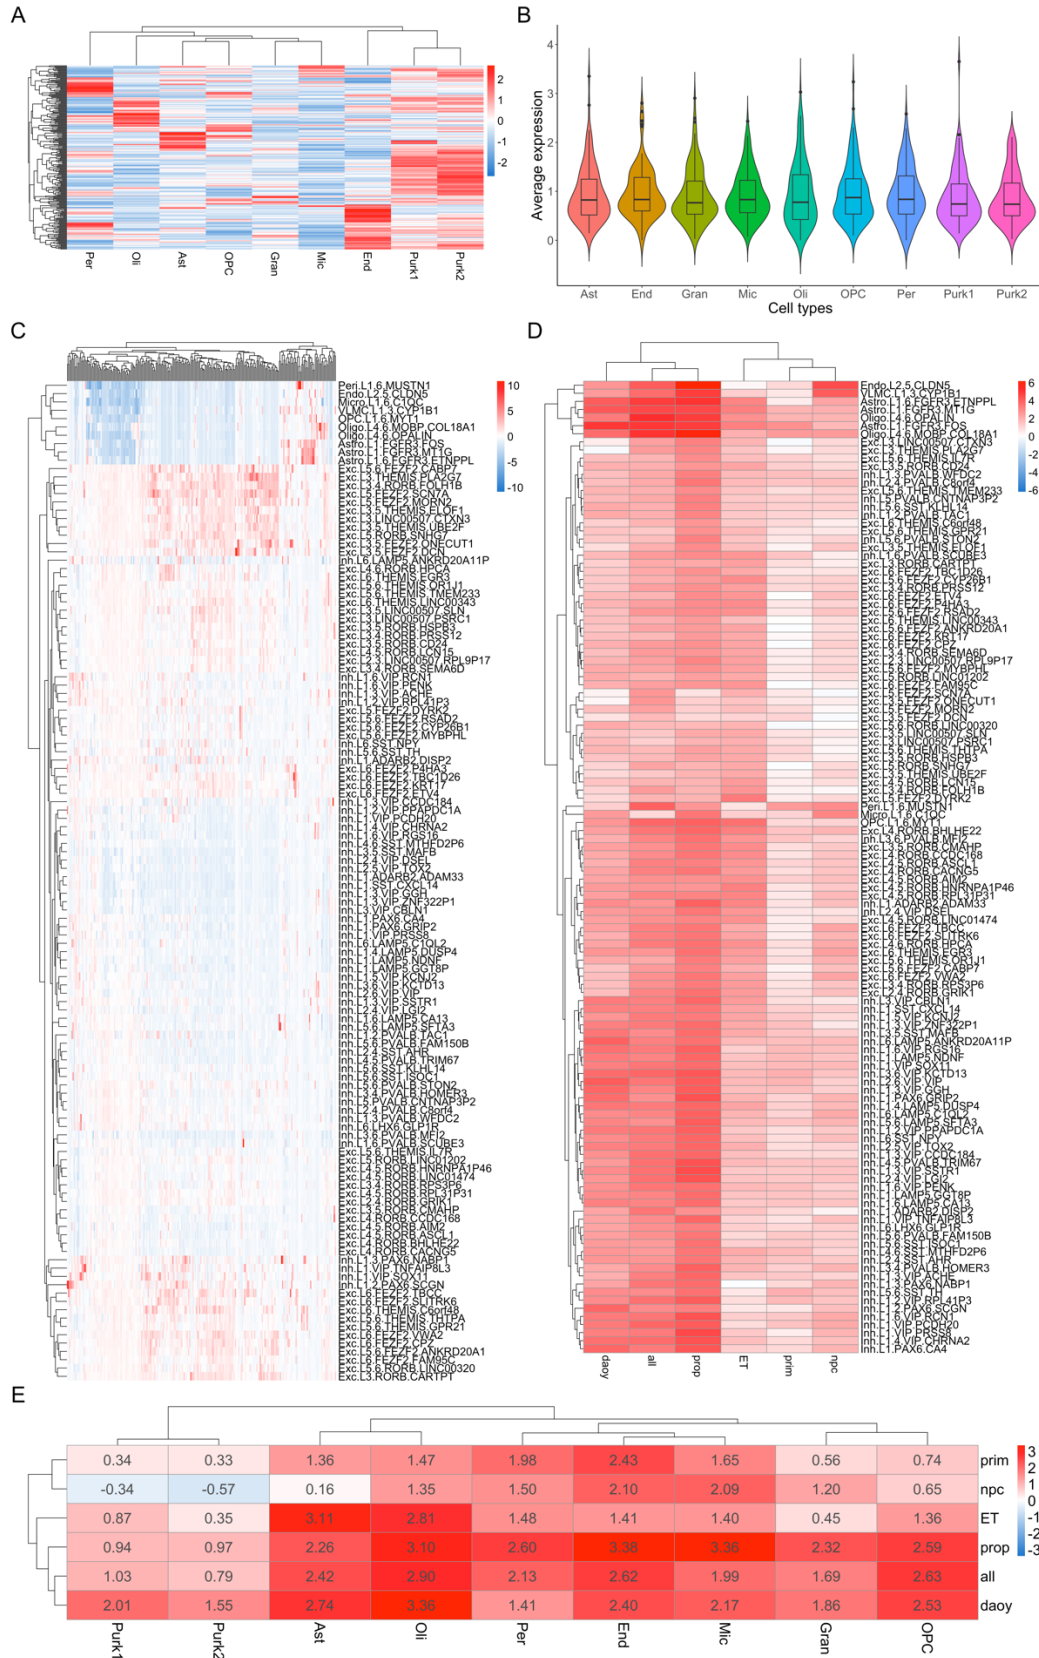

574 **Figure 5. Single-cell enrichment of drug DEGs in cerebellar and cortical tissues.** A. Single-  
 575 cell enrichment Z-score heatmap of convergent propranolol/primidone DEGs in adult cerebellar  
 576 tissue. Rows represent DEGs; columns indicate cell types; legend color scheme is based on  
 577 enrichment z-score direction. B. Violin plot of average expression per cerebellar cell type of  
 578 convergent propranolol/primidone DEGs. C. Single-cell enrichment Z-score heatmap of  
 579 convergent propranolol/primidone DEGs in adult cortical tissue. Rows represent DEGs; columns  
 580 indicate cell types; legend color scheme is based on enrichment Z-score direction. D. Enrichment  
 581 Z-score heatmap of DEGs gene-sets from different conditions (see below for abbreviations) in  
 582 single-cell data from adult cortex. E. Enrichment Z-score heatmap of DEGs gene-sets from  
 583 different conditions in single-nucleus sequencing data from adult cerebellar tissue Rows indicate  
 584 condition gene-sets; columns indicate cerebellar cell-types. Abbreviations: ET, ET related-genes;  
 585 prop, convergent propranolol DEGs in both cell types; prim, convergent primidone DEGs in both  
 586 cell types; DAOY, convergent propranolol and primidone DEGs in DAOY cells only; NPC,  
 587 convergent propranolol and primidone DEGs in NPCs only; all, convergent propranolol and  
 588 primidone DEGs in both cell types.

589 **Table 1. Pathway enrichment for convergent propranolol DEGs in both DAOYs and NPCs.**

| SOURCE | TERM                                                               | P-VALUE    |
|--------|--------------------------------------------------------------------|------------|
| CORUM  | PA700 complex                                                      | 0.00732592 |
| CORUM  | p54(nrb)-PSF-matrin3 complex                                       | 0.00741609 |
| CORUM  | PA700-20S-PA28 complex                                             | 0.01284008 |
| CORUM  | HEXIM1-DNA-PK-paraspeckle components-<br>ribonucleoprotein complex | 0.05052404 |
| CORUM  | Ubiquitin E3 ligase (CHEK1, CUL4A)                                 | 0.06576926 |
| CORUM  | CORUM root                                                         | 0.07664168 |
| CORUM  | EBAFb complex                                                      | 0.08852844 |
| CORUM  | NCOR1 complex                                                      | 0.08852844 |
| KEGG   | Proteasome                                                         | 0.00921554 |
| KEGG   | Spinocerebellar ataxia                                             | 0.02672326 |
| KEGG   | Prion disease                                                      | 0.04664458 |

|              |                                                                                                          |            |
|--------------|----------------------------------------------------------------------------------------------------------|------------|
| <b>KEGG</b>  | Protein processing in endoplasmic reticulum                                                              | 0.05311146 |
| <b>KEGG</b>  | Hippo signaling pathway - multiple species                                                               | 0.08972819 |
| <b>MIRNA</b> | hsa-miR-6766-5p                                                                                          | 0.00036715 |
| <b>MIRNA</b> | hsa-miR-6756-5p                                                                                          | 0.00036715 |
| <b>MIRNA</b> | hsa-miR-539-5p                                                                                           | 0.0003869  |
| <b>MIRNA</b> | hsa-miR-4668-3p                                                                                          | 0.00716318 |
| <b>MIRNA</b> | hsa-miR-21-5p                                                                                            | 0.0132699  |
| <b>MIRNA</b> | hsa-miR-654-5p                                                                                           | 0.02081865 |
| <b>MIRNA</b> | hsa-miR-541-3p                                                                                           | 0.02687402 |
| <b>MIRNA</b> | hsa-miR-1468-3p                                                                                          | 0.0441487  |
| <b>MIRNA</b> | hsa-let-7b-5p                                                                                            | 0.04603661 |
| <b>MIRNA</b> | hsa-miR-548f-5p                                                                                          | 0.05118884 |
| <b>MIRNA</b> | hsa-miR-548aj-5p                                                                                         | 0.05470749 |
| <b>MIRNA</b> | hsa-miR-548x-5p                                                                                          | 0.05470749 |
| <b>MIRNA</b> | hsa-miR-548g-5p                                                                                          | 0.05470749 |
| <b>MIRNA</b> | hsa-miR-193b-3p                                                                                          | 0.05509061 |
| <b>REAC</b>  | Transcriptional regulation by RUNX1                                                                      | 0.00022561 |
| <b>REAC</b>  | Oxygen-dependent proline hydroxylation of Hypoxia-inducible Factor Alpha                                 | 0.0011874  |
| <b>REAC</b>  | Cellular response to hypoxia                                                                             | 0.00350166 |
| <b>REAC</b>  | Host Interactions of HIV factors                                                                         | 0.00421087 |
| <b>REAC</b>  | Cell Cycle Checkpoints                                                                                   | 0.00665026 |
| <b>REAC</b>  | UCH proteinases                                                                                          | 0.007029   |
| <b>REAC</b>  | G2/M Checkpoints                                                                                         | 0.01195953 |
| <b>REAC</b>  | Regulation of ornithine decarboxylase (ODC)                                                              | 0.01244161 |
| <b>REAC</b>  | G1/S DNA Damage Checkpoints                                                                              | 0.01314543 |
| <b>REAC</b>  | Signaling by NOTCH                                                                                       | 0.01416007 |
| <b>REAC</b>  | p53-Independent G1/S DNA damage checkpoint                                                               | 0.01463202 |
| <b>REAC</b>  | Ubiquitin Mediated Degradation of Phosphorylated Cdc25A                                                  | 0.01463202 |
| <b>REAC</b>  | p53-Independent DNA Damage Response                                                                      | 0.01463202 |
| <b>REAC</b>  | Regulation of APC/C activators between G1/S and early anaphase                                           | 0.0153801  |
| <b>REAC</b>  | Regulation of Apoptosis                                                                                  | 0.01714052 |
| <b>REAC</b>  | Cdc20:Phospho-APC/C mediated degradation of Cyclin A                                                     | 0.02113246 |
| <b>REAC</b>  | Assembly of the pre-replicative complex                                                                  | 0.02316267 |
| <b>REAC</b>  | Deubiquitination                                                                                         | 0.02357632 |
| <b>REAC</b>  | Autodegradation of Cdh1 by Cdh1:APC/C                                                                    | 0.02437405 |
| <b>REAC</b>  | APC:Cdc20 mediated degradation of cell cycle proteins prior to satisfaction of the cell cycle checkpoint | 0.02451223 |
| <b>REAC</b>  | Regulation of MECP2 expression and activity                                                              | 0.02941481 |
| <b>REAC</b>  | Stabilization of p53                                                                                     | 0.03112835 |

|             |                                                                              |            |
|-------------|------------------------------------------------------------------------------|------------|
| <b>REAC</b> | APC/C:Cdc20 mediated degradation of mitotic proteins                         | 0.03270423 |
| <b>REAC</b> | DNA Replication Pre-Initiation                                               | 0.03291172 |
| <b>REAC</b> | Orc1 removal from chromatin                                                  | 0.03381524 |
| <b>REAC</b> | PTEN Regulation                                                              | 0.03447437 |
| <b>REAC</b> | Metabolism of polyamines                                                     | 0.03559536 |
| <b>REAC</b> | Activation of APC/C and APC/C:Cdc20 mediated degradation of mitotic proteins | 0.03762377 |
| <b>REAC</b> | Regulation of mitotic cell cycle                                             | 0.03959616 |
| <b>REAC</b> | APC/C-mediated degradation of cell cycle proteins                            | 0.03959616 |
| <b>REAC</b> | Transcriptional regulation by RUNX3                                          | 0.03975456 |
| <b>REAC</b> | CDT1 association with the CDC6:ORC:origin complex                            | 0.04112471 |
| <b>REAC</b> | MAPK6/MAPK4 signaling                                                        | 0.04224034 |
| <b>REAC</b> | Ub-specific processing proteases                                             | 0.04291446 |
| <b>REAC</b> | Switching of origins to a post-replicative state                             | 0.04311326 |
| <b>REAC</b> | APC/C:Cdc20 mediated degradation of Securin                                  | 0.045216   |
| <b>REAC</b> | Vpu mediated degradation of CD4                                              | 0.05357088 |
| <b>REAC</b> | Cross-presentation of soluble exogenous antigens (endosomes)                 | 0.07194281 |
| <b>REAC</b> | Regulation of activated PAK-2p34 by proteasome mediated degradation          | 0.07194281 |
| <b>REAC</b> | Hedgehog ligand biogenesis                                                   | 0.074096   |
| <b>REAC</b> | p53-Dependent G1/S DNA damage checkpoint                                     | 0.08163726 |
| <b>REAC</b> | p53-Dependent G1 DNA Damage Response                                         | 0.08163726 |
| <b>REAC</b> | SCF-beta-TrCP mediated degradation of Emi1                                   | 0.0874049  |
| <b>REAC</b> | CDK-mediated phosphorylation and removal of Cdc6                             | 0.09137813 |
| <b>REAC</b> | Autodegradation of the E3 ubiquitin ligase COP1                              | 0.09544567 |
| <b>REAC</b> | Ubiquitin-dependent degradation of Cyclin D                                  | 0.09544567 |
| <b>WP</b>   | mRNA Processing                                                              | 0.00409008 |
| <b>WP</b>   | CAMKK2 Pathway                                                               | 0.00436354 |
| <b>WP</b>   | Pathways Affected in Adenoid Cystic Carcinoma                                | 0.01716516 |
| <b>WP</b>   | MET in type 1 papillary renal cell carcinoma                                 | 0.02394081 |
| <b>WP</b>   | Oncostatin M Signaling Pathway                                               | 0.07825036 |
| <b>WP</b>   | 15q13.3 copy number variation syndrome                                       | 0.07966433 |
| <b>WP</b>   | Gastrin Signaling Pathway                                                    | 0.09031422 |

590

591 **Table 2. Pathway enrichment analysis of red gene module for drug treatment in DAOYs**

| <b>SOURCE</b> | <b>TERM_NAME</b>                           | <b>P_VALUE</b> |
|---------------|--------------------------------------------|----------------|
| <b>CORUM</b>  | Ubiquitin E3 ligase (CCDC22, COMMD8, CUL3) | 0.00491141     |



|              |                                                      |            |
|--------------|------------------------------------------------------|------------|
| <b>CORUM</b> | Ecsit complex (ECSIT, MT-CO2, GAPDH, TRAF6, NDUFAF1) | 0.07383335 |
| <b>REAC</b>  | TBC/RABGAPs                                          | 0.00987381 |
| <b>REAC</b>  | RUNX3 regulates YAP1-mediated transcription          | 0.02324914 |
| <b>REAC</b>  | RNA polymerase II transcribes snRNA genes            | 0.08552303 |
| <b>REAC</b>  | Rab regulation of trafficking                        | 0.09310043 |
| <b>WP</b>    | Eukaryotic Transcription Initiation                  | 0.09003334 |

592

593 **Table 3. Pathway enrichment analysis of red gene module for drug treatment in NPCs**

| <b>SOURCE</b> | <b>TERM_NAME</b>                                                   | <b>P_VALUE</b> |
|---------------|--------------------------------------------------------------------|----------------|
| <b>CORUM</b>  | AML1-HIPK2-p300 complex                                            | 0.01653182     |
| <b>CORUM</b>  | EGR-EP300 complex                                                  | 0.02266982     |
| <b>CORUM</b>  | DNA polymerase alpha-primase complex                               | 0.04115007     |
| <b>CORUM</b>  | TNF-alpha/NF-kappa B signaling complex 9                           | 0.04269448     |
| <b>GO:BP</b>  | cell morphogenesis                                                 | 9.93E-09       |
| <b>GO:BP</b>  | neuron development                                                 | 4.57E-07       |
| <b>GO:BP</b>  | neuron projection development                                      | 7.92E-07       |
| <b>GO:BP</b>  | cell morphogenesis involved in differentiation                     | 2.46E-06       |
| <b>GO:BP</b>  | neuron differentiation                                             | 3.78E-06       |
| <b>GO:BP</b>  | anatomical structure morphogenesis                                 | 5.15E-06       |
| <b>GO:BP</b>  | generation of neurons                                              | 5.51E-06       |
| <b>GO:BP</b>  | neurogenesis                                                       | 7.43E-06       |
| <b>GO:BP</b>  | cell projection morphogenesis                                      | 4.04E-05       |
| <b>GO:BP</b>  | cellular component morphogenesis                                   | 5.32E-05       |
| <b>GO:BP</b>  | cell part morphogenesis                                            | 8.74E-05       |
| <b>GO:BP</b>  | plasma membrane bounded cell projection morphogenesis              | 0.00010681     |
| <b>GO:BP</b>  | nervous system development                                         | 0.00011909     |
| <b>GO:BP</b>  | neuron projection morphogenesis                                    | 0.00017843     |
| <b>GO:BP</b>  | cell morphogenesis involved in neuron differentiation              | 0.00031702     |
| <b>GO:BP</b>  | plasma membrane bounded cell projection organization               | 0.00031755     |
| <b>GO:BP</b>  | cell projection organization                                       | 0.00043646     |
| <b>GO:BP</b>  | morphogenesis of an epithelium                                     | 0.00089496     |
| <b>GO:BP</b>  | regulation of cell projection organization                         | 0.00122012     |
| <b>GO:BP</b>  | tissue morphogenesis                                               | 0.0013445      |
| <b>GO:BP</b>  | regulation of plasma membrane bounded cell projection organization | 0.00156418     |

|              |                                                     |            |
|--------------|-----------------------------------------------------|------------|
| <b>GO:BP</b> | regulation of neuron projection development         | 0.00371164 |
| <b>GO:BP</b> | axon development                                    | 0.00411476 |
| <b>GO:BP</b> | cell development                                    | 0.00577557 |
| <b>GO:BP</b> | system development                                  | 0.00611873 |
| <b>GO:BP</b> | positive regulation of cell projection organization | 0.0234741  |
| <b>GO:BP</b> | axonogenesis                                        | 0.02708754 |
| <b>GO:BP</b> | regulation of anatomical structure morphogenesis    | 0.03347413 |
| <b>GO:BP</b> | developmental growth                                | 0.04077868 |
| <b>MIRNA</b> | hsa-miR-218-5p                                      | 0.00163474 |
| <b>REAC</b>  | Nervous system development                          | 0.01342479 |
| <b>REAC</b>  | Axon guidance                                       | 0.03273254 |
| <b>REAC</b>  | Attenuation phase                                   | 0.04873215 |
| <b>WP</b>    | Pathways Affected in Adenoid Cystic Carcinoma       | 0.00025871 |
| <b>WP</b>    | Mesodermal Commitment Pathway                       | 0.0277441  |

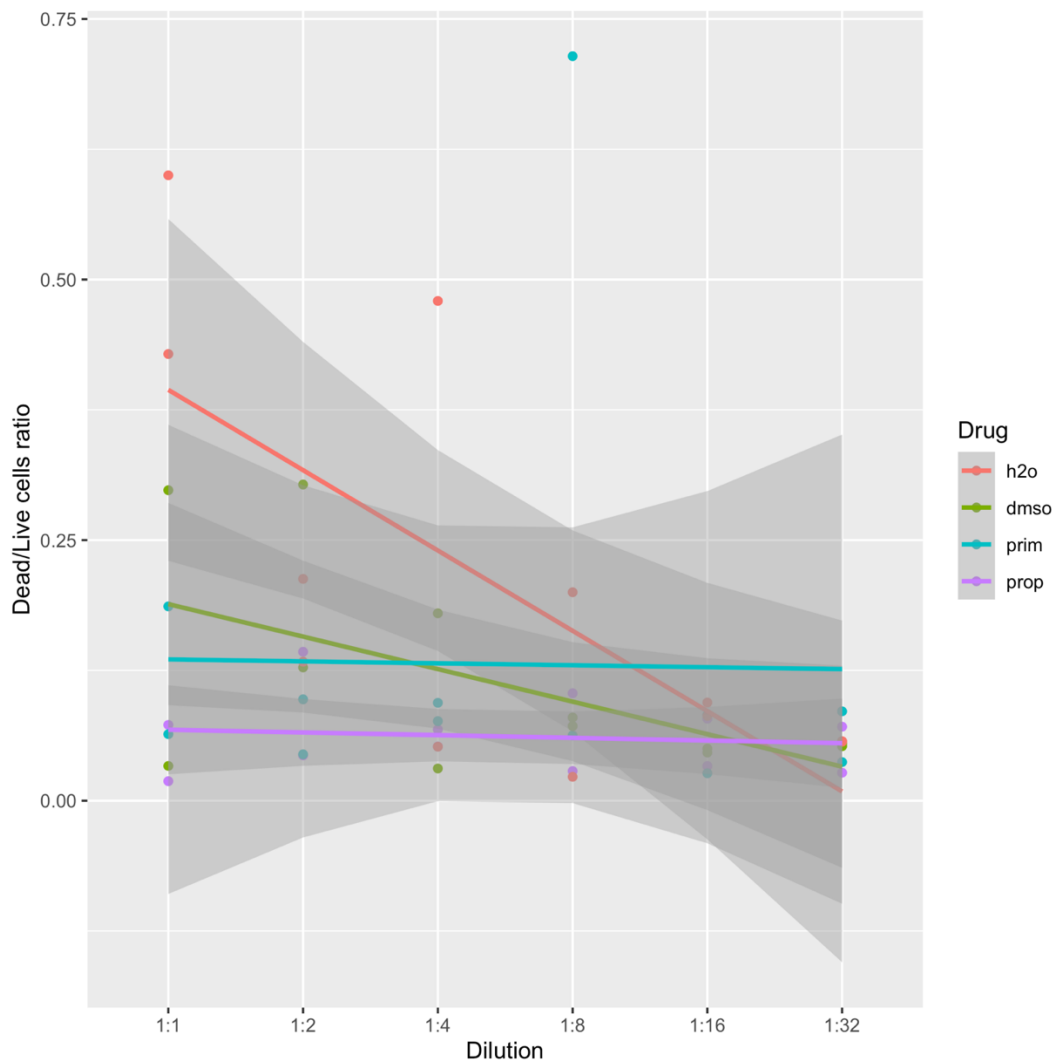

595

596 **Supplementary Figure 1. DAOY kill curve.** Dead over live cell ratios were calculated based on

597 NucGreen and NucBlue (DAPI) staining after 5 days of treatment. Dilutions are calculated from

598 initial concentrations of drugs or DMSO (%; corresponding to the percentage of DMSO that

599 primidone was diluted in). 1:1 dilutions; Propranolol = 0.0156  $\mu\text{g}/\text{mL}$ , Primidone = 25  $\mu\text{g}/\text{mL}$ ;

600 DMSO = 0.235%.

601

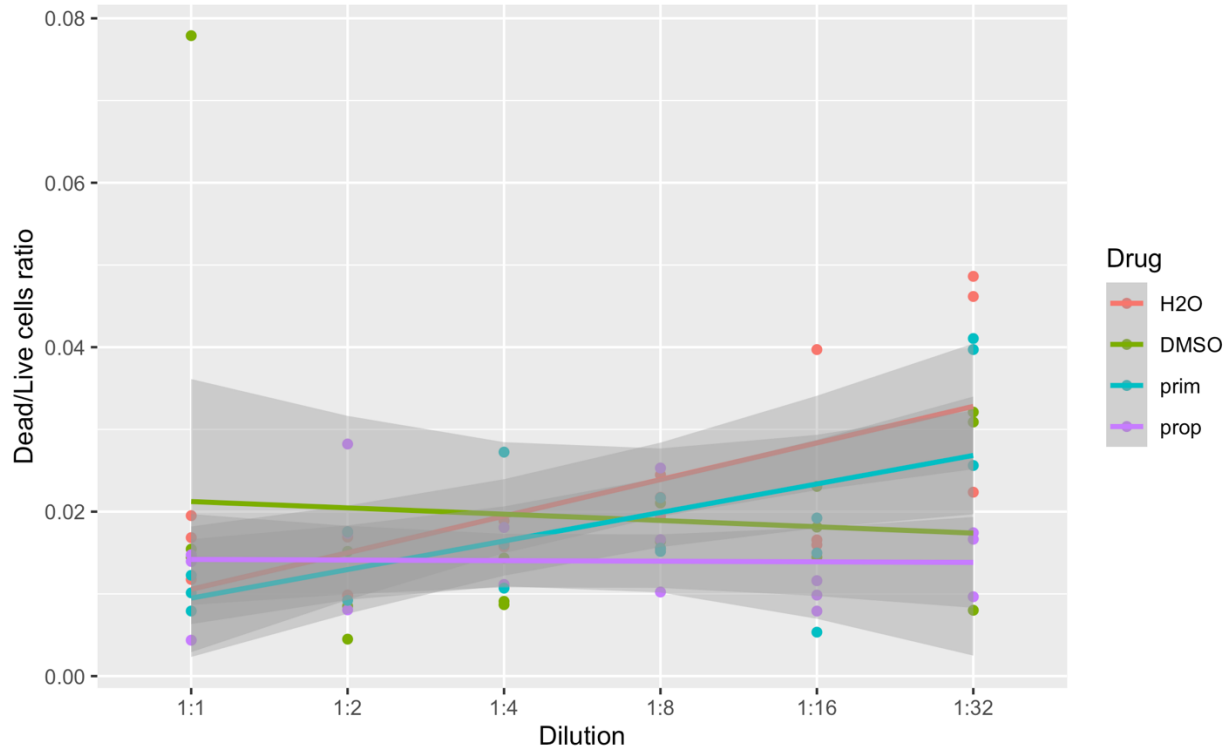

602

603 **Supplementary Figure 2. NPC kill curve.** Dead over live cell ratios were calculated based on  
604 NucGreen and NucBlue (DAPI) staining after 5 days of treatment. Dilutions are calculated from  
605 initial concentrations of drugs or DMSO (%; corresponding to the percentage of DMSO that  
606 primidone was diluted in). 1:1 dilutions; Propranolol = 0.0156  $\mu\text{g}/\text{mL}$ , Primidone = 25  $\mu\text{g}/\text{mL}$ ;  
607 DMSO = 0.235%.

608

609

610

611

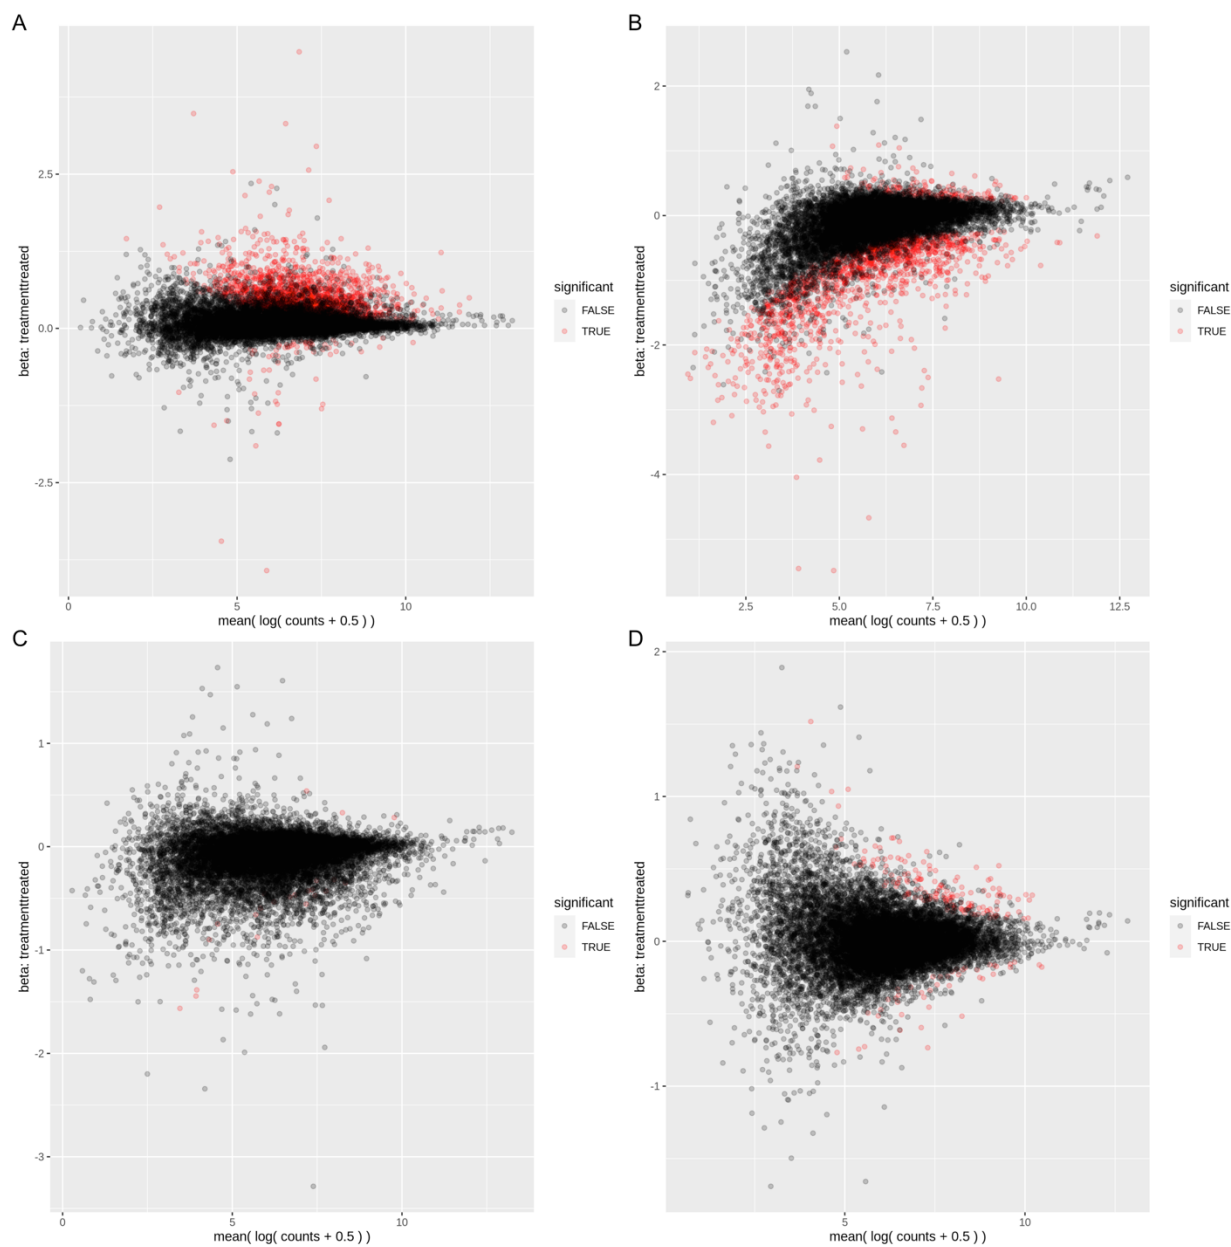

612

613 **Supplementary Figure 3. Mean A plots.** A. DAOYs treated with propranolol. B. DAOYs treated

614 with primidone. C. NPCs treated with propranolol. D. NPCs treated with primidone

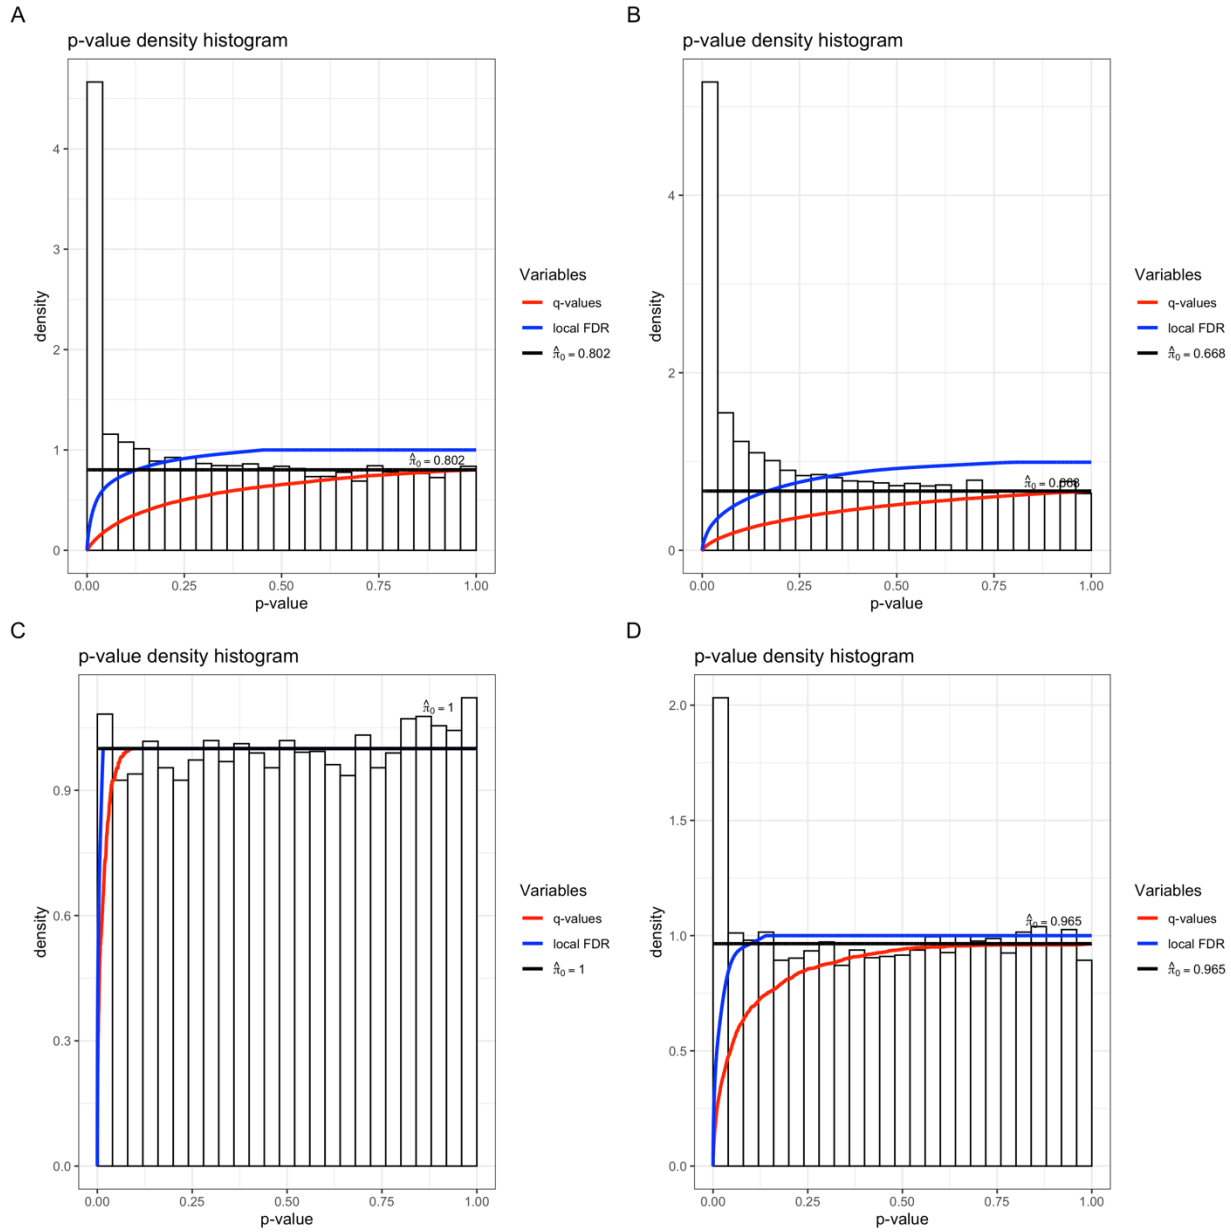

615

616 **Supplementary Figure 4. P-value histograms.** A. DAOYs treated with propranolol. B. DAOYs

617 treated with primidone. C. NPCs treated with propranolol. D. NPCs treated with primidone.

618

619
